# Supplementary material for: Optimizing anaerobic growth rate and fermentation kinetics in Saccharomyces cerevisiae strains expressing Calvin-cycle enzymes for improved ethanol yield
Source: PubMed Central journal article supplement (PMC5784725; doi:10.1186/s13068-017-1001-z), 2018-01-25
Supplement: 13068_2017_1001_MOESM4_ESM.pdf [file 13068_2017_1001_MOESM4_ESM.pdf]

A

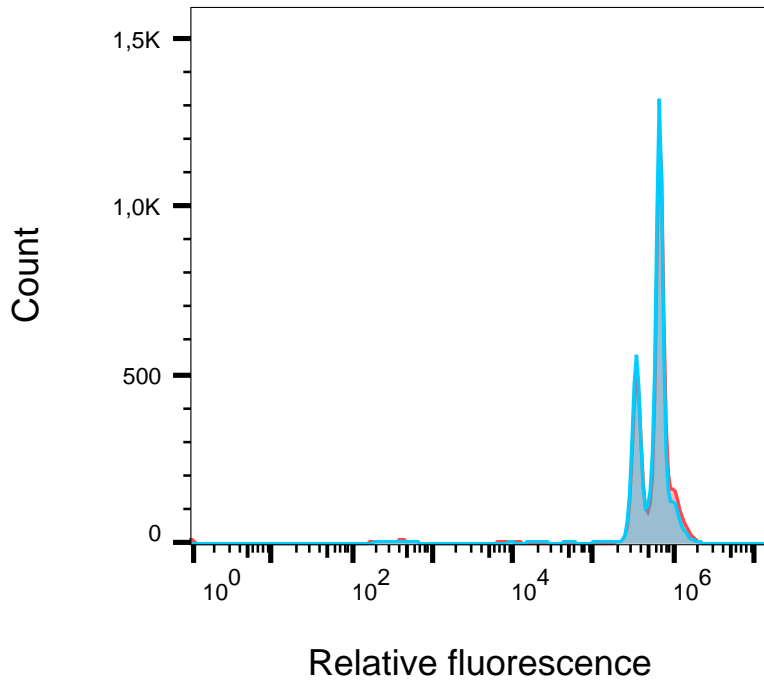

|   | Sample Name | Subset Name | Count |
|---|-------------|-------------|-------|
| ■ | A03 581.fcs | Ungated     | 10000 |
| ■ | A01 5D.fcs  | Ungated     | 10000 |

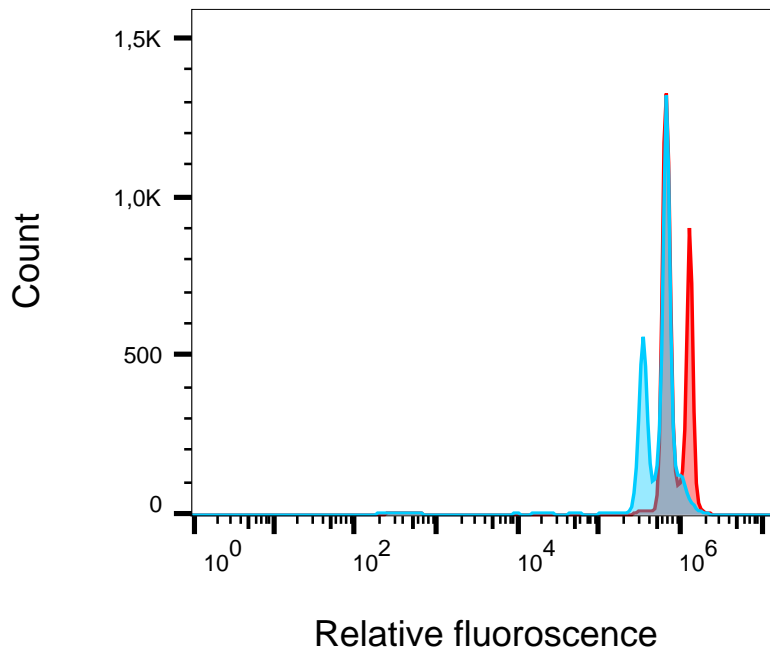

|   | Sample Name | Subset Name | Count |
|---|-------------|-------------|-------|
| ■ | A03 581.fcs | Ungated     | 10000 |
| ■ | A02 122.fcs | Ungated     | 10000 |

B

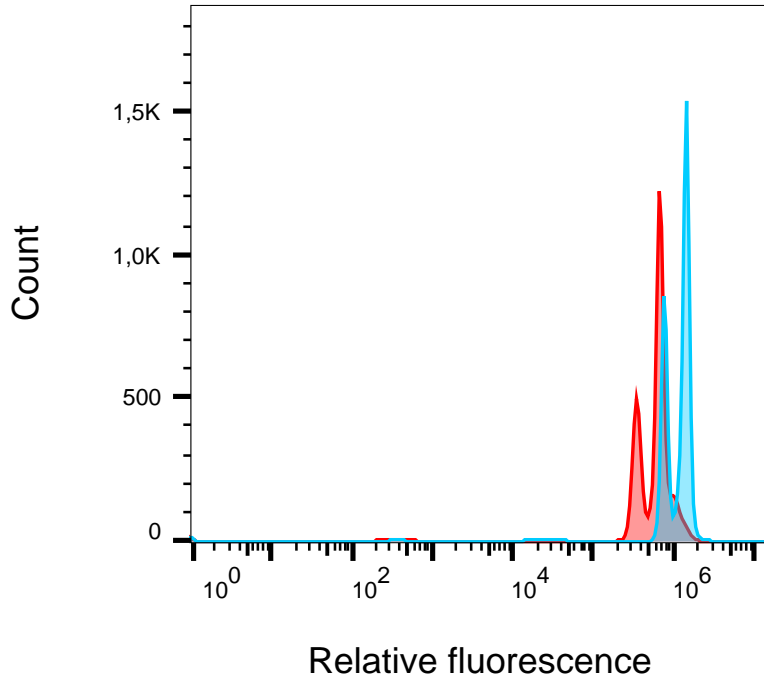

|   | Sample Name    | Subset Name | Count |
|---|----------------|-------------|-------|
| ■ | A04 IMX765.fcs | Ungated     | 10000 |
| ■ | A01 5D.fcs     | Ungated     | 10000 |

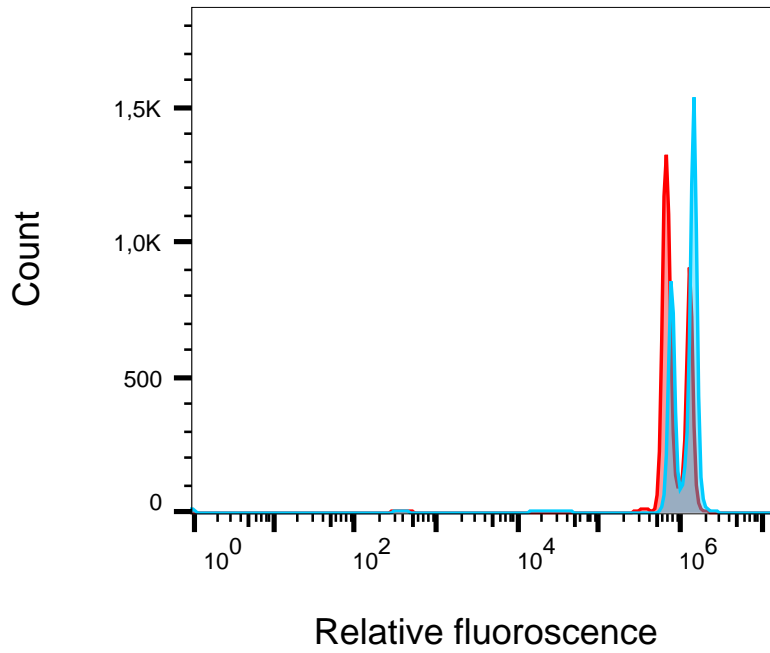

|   | Sample Name    | Subset Name | Count |
|---|----------------|-------------|-------|
| ■ | A04 IMX765.fcs | Ungated     | 10000 |
| ■ | A02 122.fcs    | Ungated     | 10000 |

C

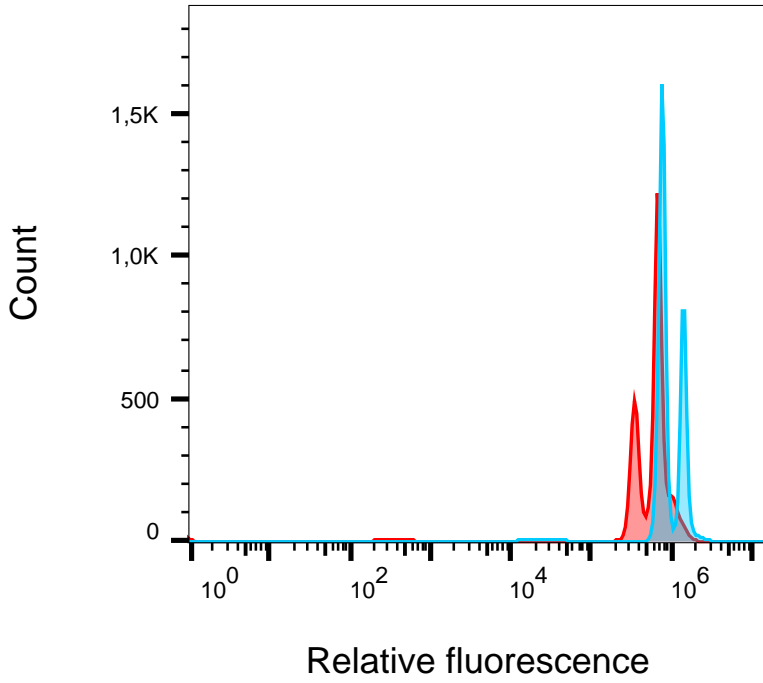

|   | Sample Name    | Subset Name | Count |
|---|----------------|-------------|-------|
| ■ | A05 IMX773.fcs | Ungated     | 10000 |
| ■ | A01 5D.fcs     | Ungated     | 10000 |

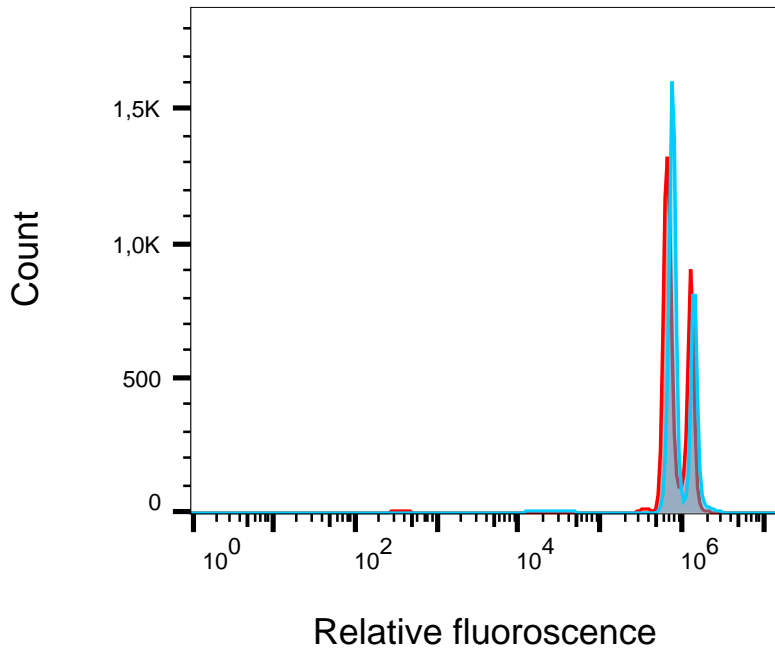

|   | Sample Name    | Subset Name | Count |
|---|----------------|-------------|-------|
| ■ | A05 IMX773.fcs | Ungated     | 10000 |
| ■ | A02 122.fcs    | Ungated     | 10000 |

D

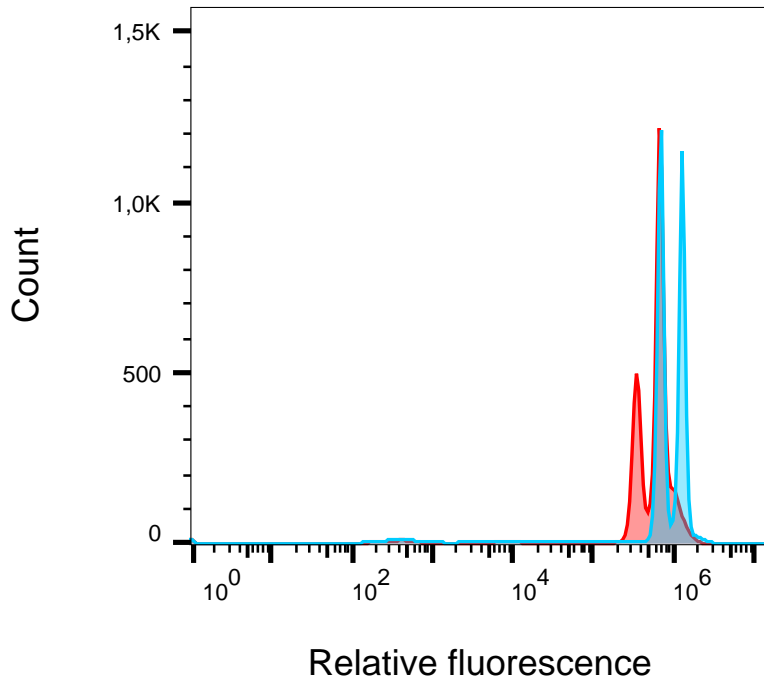

|   | Sample Name | Subset Name | Count |
|---|-------------|-------------|-------|
| ■ | A04 774.fcs | Ungated     | 10000 |
| ■ | A01 5D.fcs  | Ungated     | 10000 |

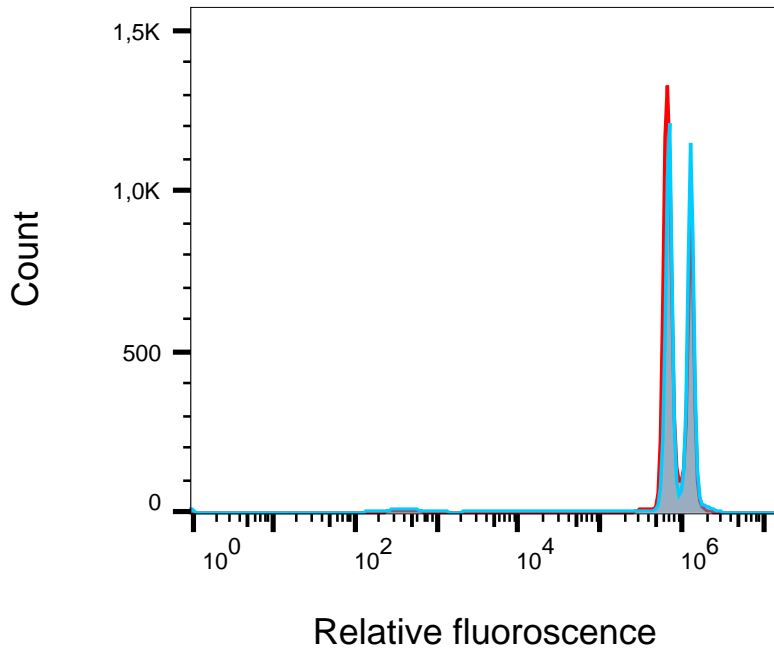

|   | Sample Name | Subset Name | Count |
|---|-------------|-------------|-------|
| ■ | A04 774.fcs | Ungated     | 10000 |
| ■ | A02 122.fcs | Ungated     | 10000 |

E

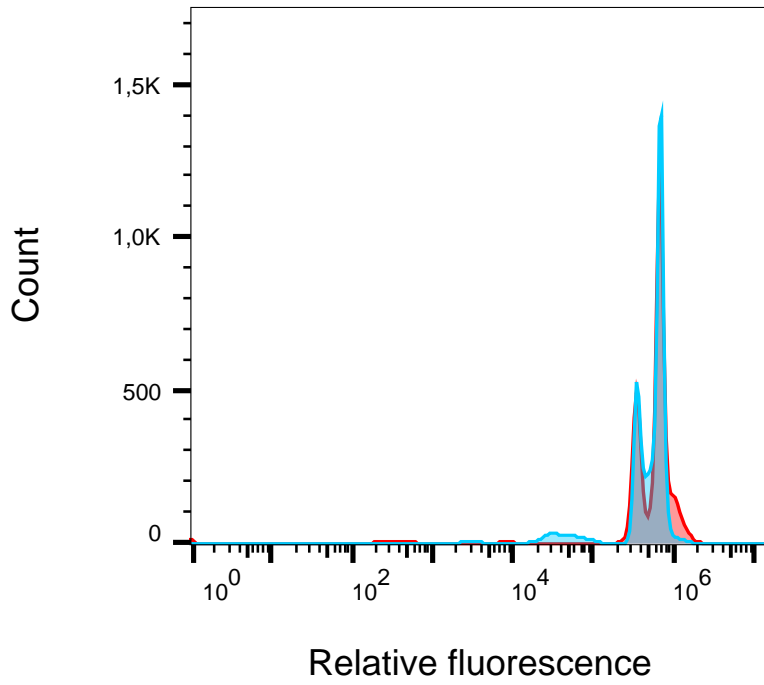

|   | Sample Name     | Subset Name | Count |
|---|-----------------|-------------|-------|
| ■ | A03 IMX1489.fcs | Ungated     | 10000 |
| ■ | A01 5D.fcs      | Ungated     | 10000 |

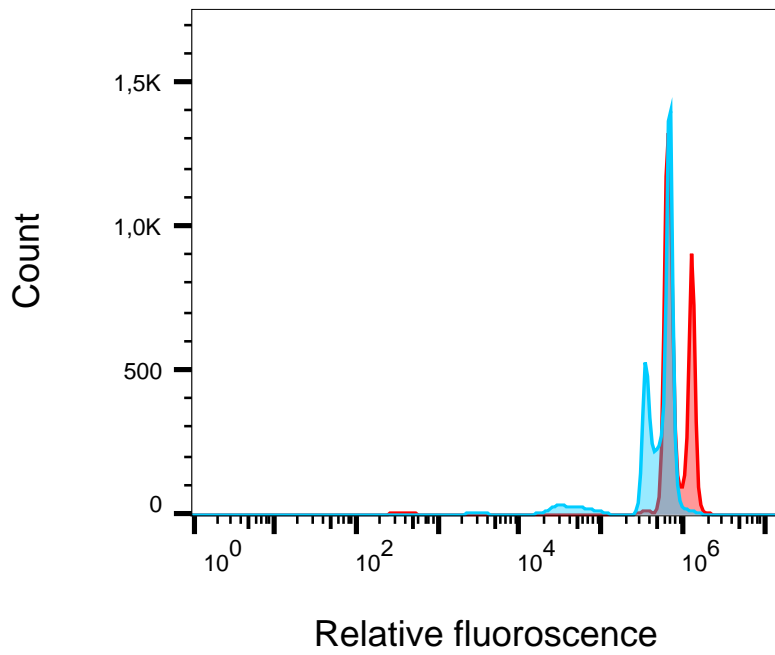

|   | Sample Name     | Subset Name | Count |
|---|-----------------|-------------|-------|
| ■ | A03 IMX1489.fcs | Ungated     | 10000 |
| ■ | A02 122.fcs     | Ungated     | 10000 |
